# Supplementary material
Source: PubMed Central journal article supplement (PMC11071853)

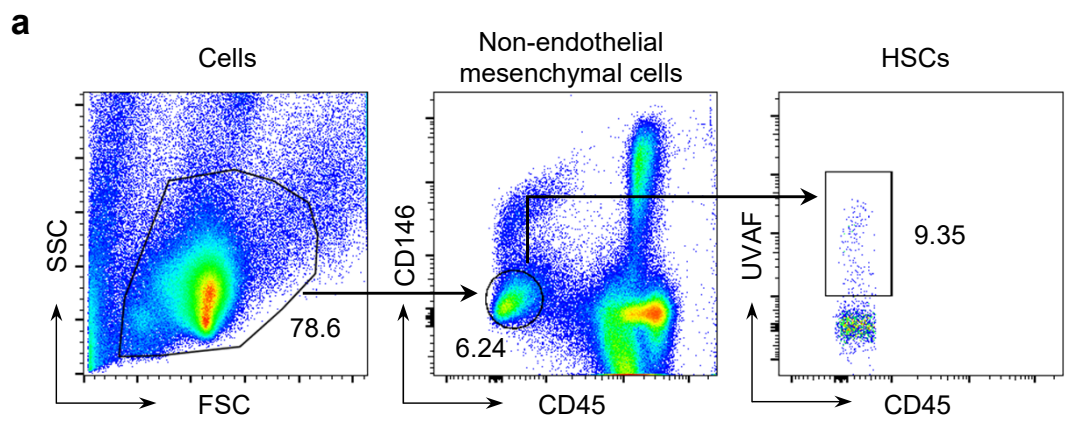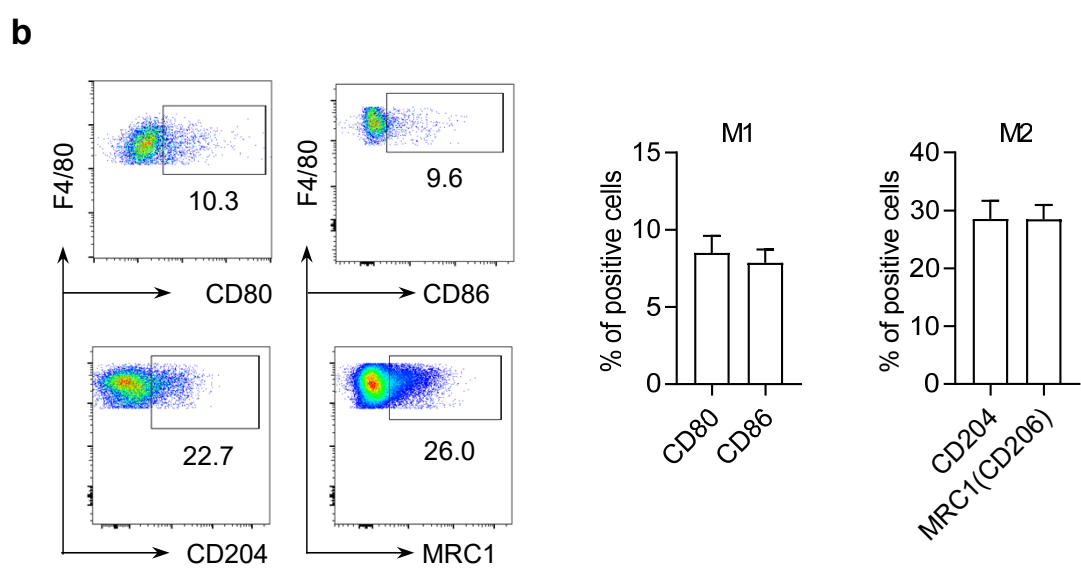

**Suppl. Figure 2**

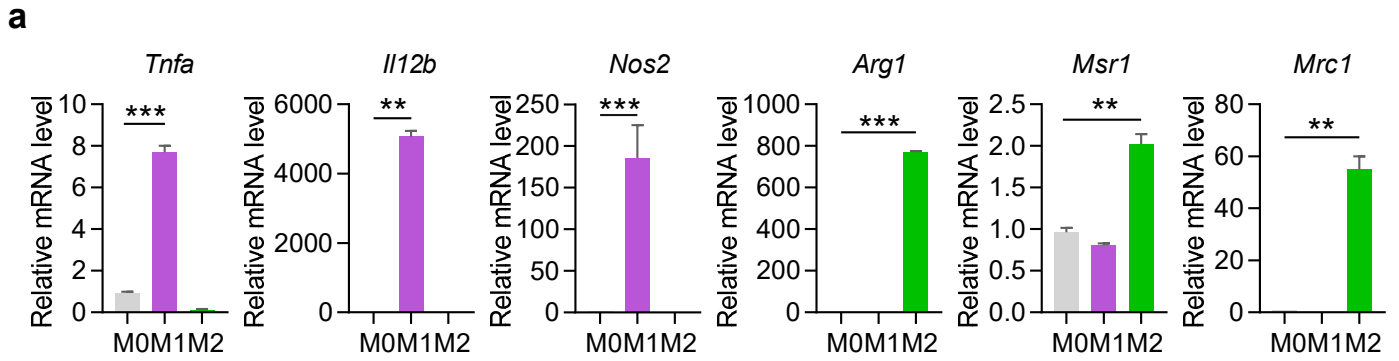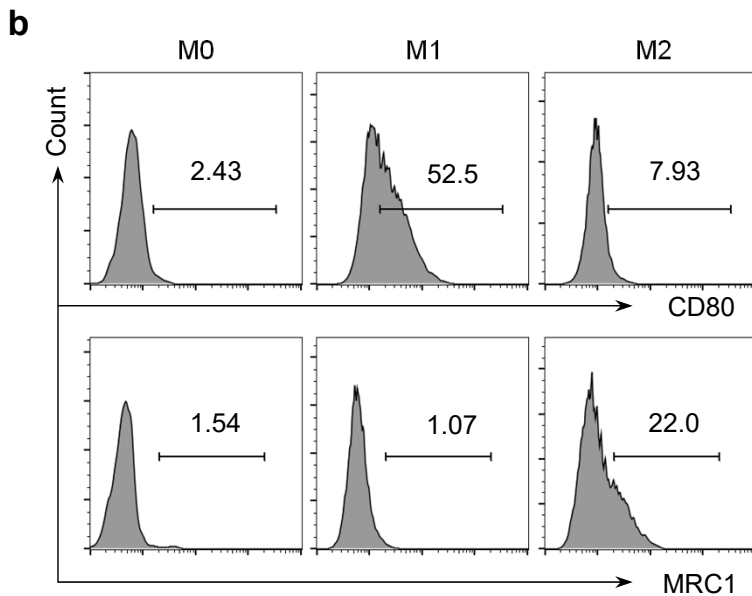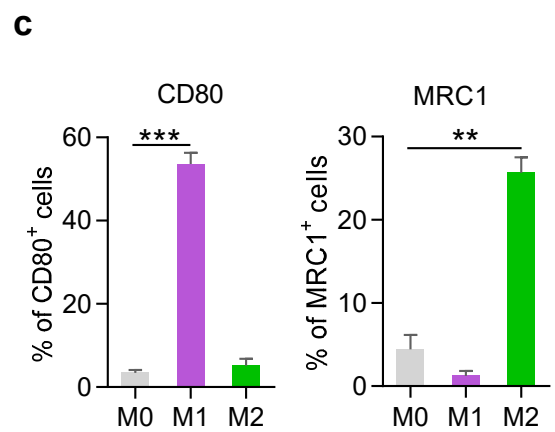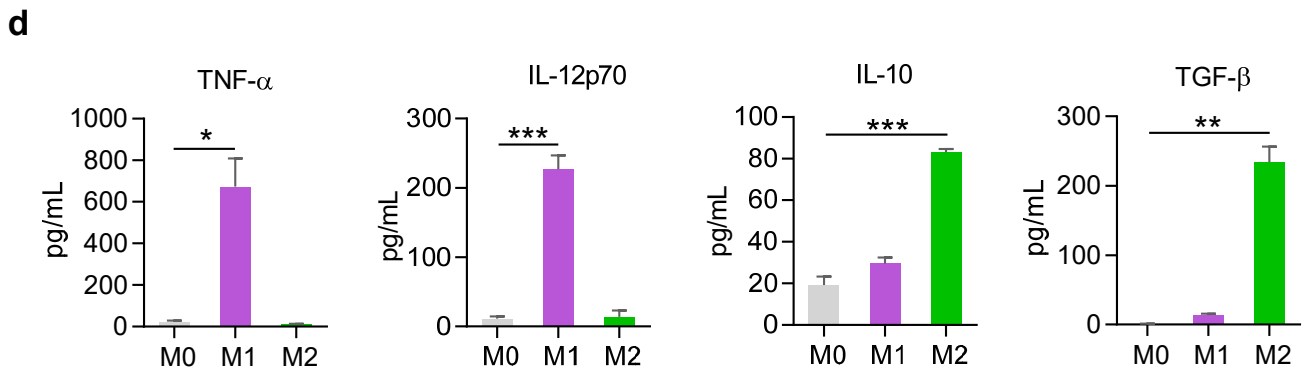

**Suppl. Figure 3**

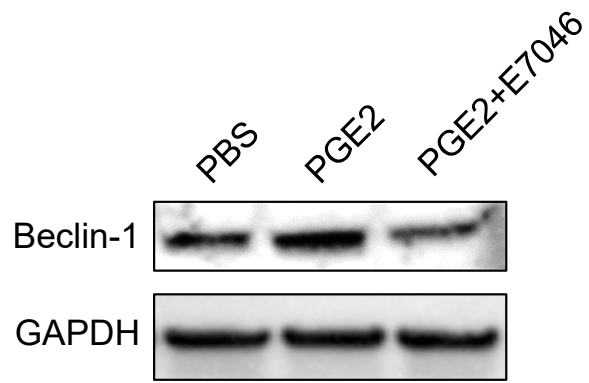

**Suppl. Figure 4**

Supplement: 18_2022_4319_MOESM2_ESM.pdf [file 18_2022_4319_MOESM2_ESM.pdf]
